# Supplementary material for: International electronic health record-derived post-acute sequelae profiles of COVID-19 patients
Source: PubMed Central journal article supplement (PMC9242995; doi:10.1038/s41746-022-00623-8), 2022-06-29
Supplement: 41746_2022_623_MOESM1_ESM.pdf [file 41746_2022_623_MOESM1_ESM.pdf]

**Supplementary Information for**  
**“International electronic health record-derived post-acute sequelae profiles of COVID-19 patients”**

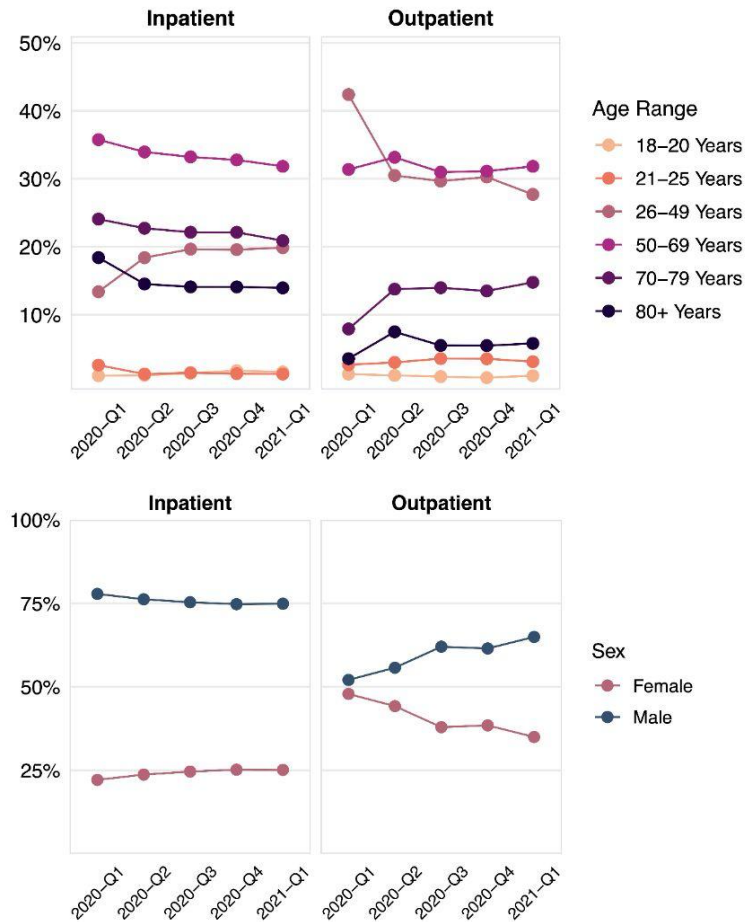

Supplementary Figure 1: Proportion of demographic characteristics for age and sex across time among control inpatients and outpatients.

## Supplementary Note 1: Consortium for Clinical Characterization of COVID-19 by EHR (4CE) Members and Affiliations

James R Aaron<sup>40</sup>, Giuseppe Agapito<sup>41</sup>, Adem Albayrak<sup>42</sup>, Giuseppe Albi<sup>29</sup>, Mario Alessiani<sup>43</sup>, Anna Alloni<sup>38</sup>, Danilo F Amendola<sup>44</sup>, François Angoulvant<sup>45</sup>, Li L.L.J Anthony<sup>46</sup>, Bruce J Aronow<sup>33</sup>, Fatima Ashraf<sup>47</sup>, Andrew Atz<sup>48</sup>, Paul Avillach<sup>1</sup>, Paula S Azevedo<sup>49</sup>, James Balshi<sup>50</sup>, Brett K Beaulieu-Jones<sup>1</sup>, Douglas S Bell<sup>24</sup>, Antonio Bellasi<sup>51</sup>, Riccardo Bellazzi<sup>29</sup>, Vincent Benoit<sup>25</sup>, Michele Beraghi<sup>52</sup>, José Luis Bernal-Sobrino<sup>53</sup>, Mélodie Bernaux<sup>54</sup>, Romain Bey<sup>25</sup>, Surbhi Bhatnagar<sup>33</sup>, Alvar Blanco-Martínez<sup>53</sup>, Clara-Lea Bonzel<sup>1</sup>, John Booth<sup>55</sup>, Silvano Bosari<sup>36</sup>, Florence T Bourgeois<sup>12</sup>, Robert L Bradford<sup>56</sup>, Gabriel A Brat<sup>1</sup>, Stéphane Bréant<sup>57</sup>, Nicholas W Brown<sup>1</sup>, Raffaele Bruno<sup>58</sup>, William A Bryant<sup>55</sup>, Mauro Bucalo<sup>38</sup>, Emily Bucholz<sup>59</sup>, Anita Burgun<sup>60</sup>, Tianxi Cai<sup>1</sup>, Mario Cannataro<sup>61</sup>, Aldo Carmona<sup>62</sup>, Charlotte Caucheteux<sup>63</sup>, Julien Champ<sup>64</sup>, Jin Chen<sup>65</sup>, Krista Y Chen<sup>66</sup>, Luca Chiovato<sup>32</sup>, Lorenzo Chiudinelli<sup>67</sup>, Kelly Cho<sup>30</sup>, James J Cimino<sup>68</sup>, Tiago K Colicchio<sup>68</sup>, Sylvie Cormont<sup>57</sup>, Sébastien Cossin<sup>31</sup>, Jean B Craig<sup>69</sup>, Juan Luis Cruz-Bermúdez<sup>53</sup>, Jaime Cruz-Rojo<sup>53</sup>, Arianna Dagliati<sup>2</sup>, Mohamad Daniar<sup>70</sup>, Christel Daniel<sup>71</sup>, Priyam Das<sup>1</sup>, Batsal Devkota<sup>72</sup>, Audrey Dionne<sup>59</sup>, Rui Duan<sup>3</sup>, Julien Dubiel<sup>57</sup>, Scott L DuVall<sup>73</sup>, Loic Esteve<sup>74</sup>, Hossein Estiri<sup>16</sup>, Shirley Fan<sup>75</sup>, Robert W Follett<sup>24</sup>, Thomas Ganslandt<sup>76</sup>, Noelia García-Barrio<sup>53</sup>, Lana X Garmire<sup>77</sup>, Nils Gehlenborg<sup>1</sup>, Emily J Getzen<sup>78</sup>, Alon Geva<sup>79</sup>, Tobias Gradinger<sup>76</sup>, Alexandre Gramfort<sup>63</sup>, Romain Griffier<sup>31</sup>, Nicolas Griffon<sup>71</sup>, Olivier Grisel<sup>63</sup>, Alba Gutiérrez-Sacristán<sup>1</sup>, Larry Han<sup>3</sup>, David A Hanauer<sup>9</sup>, Christian Haverkamp<sup>80</sup>, Derek Y Hazard<sup>81</sup>, Bing He<sup>77</sup>, Darren W Henderson<sup>40</sup>, Martin Hilka<sup>57</sup>, Yuk-Lam Ho<sup>23</sup>, John H Holmes<sup>10,11</sup>, Chuan Hong<sup>6,1</sup>, Kenneth M Huling<sup>1</sup>, Meghan R Hutch<sup>82</sup>, Richard W Issitt<sup>55</sup>, Anne Sophie Jannot<sup>83</sup>, Vianney Jouhet<sup>31</sup>, Ramakanth Kavuluru<sup>26</sup>, Mark S Keller<sup>1</sup>, Chris J Kennedy<sup>84</sup>, Daniel A Key<sup>55</sup>, Katie Kirchoff<sup>85</sup>, Jeffrey G Klann<sup>16</sup>, Isaac S Kohane<sup>1</sup>, Ian D Krantz<sup>86</sup>, Detlef Kraska<sup>87</sup>, Ashok K Krishnamurthy<sup>88</sup>, Sehi L'Yi<sup>1</sup>, Trang T Le<sup>10</sup>, Judith Leblanc<sup>89</sup>, Guillaume Lemaitre<sup>63</sup>, Leslie Lenert<sup>69</sup>, Damien Leprovost<sup>90</sup>, Molei Liu<sup>91</sup>, Ne Hooi Will Loh<sup>92</sup>, Qi Long<sup>93</sup>, Sara Lozano-Zahonero<sup>21</sup>, Yuan Luo<sup>82</sup>, Kristine E Lynch<sup>73</sup>, Sadiqa Mahmood<sup>42</sup>, Sarah E Maidlow<sup>13</sup>, Adeline Makoudjou<sup>21</sup>, Alberto Malovini<sup>28</sup>, Kenneth D Mandl<sup>66</sup>, Chengsheng Mao<sup>82</sup>, Anupama Maram<sup>94</sup>, Patricia Martel<sup>95</sup>, Marcelo R Martins<sup>96</sup>, Jayson S Marwaha<sup>97</sup>, Aaron J Masino<sup>98</sup>, Maria Mazzitelli<sup>99</sup>, Arthur Mensch<sup>100</sup>, Marianna Milano<sup>101</sup>, Marcos F Minicucci<sup>102</sup>, Bertrand Moal<sup>14</sup>, Taha Mohseni Ahooyi<sup>103</sup>, Jason H Moore<sup>104</sup>, Cinta Moraleda<sup>105</sup>, Jeffrey S Morris<sup>106</sup>, Michele Morris<sup>7</sup>, Karyn L Moshal<sup>107</sup>, Sajad Mousavi<sup>1</sup>, Danielle L Mowery<sup>10</sup>, Douglas A Murad<sup>24</sup>, Shawn N Murphy<sup>15</sup>, Thomas P Naughton<sup>108</sup>, Carlos Tadeu Breda Neto<sup>44</sup>, Antoine Neuraz<sup>17</sup>, Jane Newburger<sup>59</sup>, Kee Yuan Ngiam<sup>109</sup>, Wanjiku FM Njoroge<sup>110</sup>, James B Norman<sup>1</sup>, Jihad Obeid<sup>69</sup>, Marina P Okoshi<sup>102</sup>, Karen L Olson<sup>111</sup>, Gilbert S. Omenn<sup>20</sup>, Nina Orlova<sup>57</sup>, Brian D Ostasiewski<sup>112</sup>, Nathan P Palmer<sup>1</sup>, Nicolas Paris<sup>57</sup>, Lav P Patel<sup>8</sup>, Miguel Pedrera-Jiménez<sup>53</sup>, Emily R Pfaff<sup>113</sup>, Ashley C Pfaff<sup>114</sup>, Danielle Pillion<sup>1</sup>, Sara Pizzimenti<sup>36</sup>, Hans U Prokosch<sup>115</sup>, Robson A Prudente<sup>116</sup>, Andrea Prunotto<sup>21</sup>, Víctor Quirós-González<sup>53</sup>, Rachel B Ramoni<sup>117</sup>, Maryna Raskin<sup>42</sup>, Siegbert Rieg<sup>118</sup>, Gustavo Roig-Domínguez<sup>53</sup>, Pablo Rojo<sup>119</sup>, Paula Rubio-Mayo<sup>53</sup>, Paolo Sacchi<sup>58</sup>, Carlos Sáez<sup>120</sup>, Elisa Salamanca<sup>57</sup>, Malarkodi Jebathilagam Samayamuthu<sup>7</sup>, L. Nelson Sanchez-Pinto<sup>121</sup>, Arnaud Sandrin<sup>57</sup>, Nandhini Santhanam<sup>76</sup>, Janaina C.C Santos<sup>122</sup>, Fernando J Sanz Vidorreta<sup>24</sup>, Maria Savino<sup>123</sup>, Emily R Schriver<sup>124</sup>, Petra Schubert<sup>23</sup>, Juergen Schuettler<sup>125</sup>, Luigia Scudeller<sup>36</sup>, Neil J Sebire<sup>55</sup>, Pablo Serrano-Balazote<sup>53</sup>, Patricia Serre<sup>57</sup>, Arnaud Serret-Larmande<sup>126</sup>, Mohsin Shah<sup>55</sup>, Zahra Shakeri Hossein Abad<sup>1</sup>, Domenick Silvio<sup>127</sup>, Piotr Sliz<sup>66</sup>, Jiyeon Son<sup>128</sup>, Charles Sondag<sup>129</sup>, Andrew M South<sup>39</sup>, Anastasia Spiridou<sup>55</sup>, Zachary H. Strasser<sup>16</sup>, Amelia LM Tan<sup>1</sup>, Bryce W.Q. Tan<sup>5</sup>, Byorn W.L. Tan<sup>5</sup>, Suzana E Tanni<sup>102</sup>, Deanne M Taylor<sup>130</sup>, Ana I Terriza-Torres<sup>53</sup>, Valentina Tibollo<sup>28</sup>, Patric Tippmann<sup>81</sup>, Emma MS Toh<sup>34</sup>, Carlo Torti<sup>99</sup>, Enrico M Trecarichi<sup>99</sup>, Yi-Ju Tseng<sup>131</sup>,

Andrew K Vallejos<sup>132</sup>, Gael Varoquaux<sup>133</sup>, Margaret E Vella<sup>1</sup>, Guillaume Verdy<sup>14</sup>, Jill-Jênn Vie<sup>134</sup>, Shyam Visweswaran<sup>7</sup>, Michele Vitacca<sup>135</sup>, Kavishwar B Waghlikar<sup>37</sup>, Lemuel R Waitman<sup>136</sup>, Xuan Wang<sup>1</sup>, Demian Wassermann<sup>63</sup>, Griffin M Weber<sup>1</sup>, Martin Wolkewitz<sup>81</sup>, Scott Wong<sup>5</sup>, Zongqi Xia<sup>4</sup>, Xin Xiong<sup>3</sup>, Ye Ye<sup>7</sup>, Nadir Yehya<sup>137</sup>, William Yuan<sup>1</sup>, Alberto Zambelli<sup>138</sup>, Harrison G Zhang<sup>1</sup>, Daniela Zöller<sup>21</sup>, Valentina Zuccaro<sup>58</sup>, Chiara Zucco<sup>101</sup>

<sup>1</sup>Department of Biomedical Informatics, Harvard Medical School, Boston, United States, <sup>2</sup>Department of Electrical Computer and Biomedical Engineering, University of Pavia, Pavia, Italy, <sup>3</sup>Department of Biostatistics, Harvard T.H. Chan School of Public Health, Boston, United States, <sup>4</sup>Department of Neurology, University of Pittsburgh, Pittsburgh, United States, <sup>5</sup>Department of Medicine, National University Hospital, Singapore, Singapore, Singapore, <sup>6</sup>Department of Biostatistics and Bioinformatics, Duke University, Durham, United States, <sup>7</sup>Department of Biomedical Informatics, University of Pittsburgh, Pittsburgh, United States, <sup>8</sup>Department of Internal Medicine, Division of Medical Informatics, University Of Kansas Medical Center, Kansas City, United States, <sup>9</sup>Department of Learning Health Sciences, University of Michigan Medical School, Ann Arbor, United States, <sup>10</sup>Department of Biostatistics, Epidemiology, and Informatics, University of Pennsylvania Perelman School of Medicine, Philadelphia, United States, <sup>11</sup>Institute for Biomedical Informatics, University of Pennsylvania Perelman School of Medicine, Philadelphia, United States, <sup>12</sup>Department of Pediatrics, Harvard Medical School, Boston, United States, <sup>13</sup>Michigan Institute for Clinical and Health Research (MICHR) Informatics, University of Michigan, Ann Arbor, United States, <sup>14</sup>IAM unit, Bordeaux University Hospital, Bordeaux, France, <sup>15</sup>Department of Neurology, Massachusetts General Hospital, Boston, United States, <sup>16</sup>Department of Medicine, Massachusetts General Hospital, Boston, United States, <sup>17</sup>Department of biomedical informatics, Hôpital Necker-Enfants Malade, Assistance Publique Hôpitaux de Paris (APHP), University of Paris, Paris, France, <sup>18</sup>Department of Biomedical informatics, WiSDM, National University Health Systems Singapore, Singapore, Singapore, <sup>19</sup>Department of Anaesthesia, National University Health Systems Singapore, Singapore, Singapore, <sup>20</sup>Dept of Computational Medicine & Bioinformatics, Internal Medicine, Human Genetics, and School of Public Health, University of Michigan, Ann Arbor, United States, <sup>21</sup>Institute of Medical Biometry and Statistics, Faculty of Medicine and Medical Center, University of Freiburg, Freiburg, Germany, <sup>22</sup>Department of Ophthalmology, Mayo Clinic, Rochester, United States, <sup>23</sup>Massachusetts Veterans Epidemiology Research and Information Center (MAVERIC), VA Boston Healthcare System, Boston, United States, <sup>24</sup>Department of Medicine, David Geffen School of Medicine at UCLA, Los Angeles, United States, <sup>25</sup>IT Department, Innovation & Data, APHP Greater Paris University Hospital, Paris, France, <sup>26</sup>Division of Biomedical Informatics (Department of Internal Medicine), University of Kentucky, Lexington, United States, <sup>27</sup>Department of Preventive Medicine, Northwestern University, Chicago, USA, <sup>28</sup>Laboratory of Informatics and Systems Engineering for Clinical Research, Istituti Clinici Scientifici Maugeri SpA SB IRCCS, Pavia, Italy, <sup>29</sup>Department of Electrical, Computer and Biomedical Engineering, University of Pavia, Pavia, Italy, <sup>30</sup>Population Health and Data Science, MAVERIC, VA Boston Healthcare System, Boston, United States, <sup>31</sup>IAM unit, INSERM Bordeaux Population Health ERIAS TEAM, Bordeaux University Hospital / ERIAS - Inserm U1219 BPH, Bordeaux, France, <sup>32</sup>Unit of Internal Medicine and Endocrinology, Istituti Clinici Scientifici Maugeri SpA SB IRCCS, Pavia, Italy, <sup>33</sup>Departments of Biomedical Informatics, Pediatrics, Cincinnati Children's Hospital Medical Center, University of Cincinnati, Cincinnati, United States, <sup>34</sup>Yong Loo Lin School of Medicine, National University of Singapore, Singapore, Singapore, <sup>35</sup>Department of Medicine, National University Health Systems Singapore, Singapore, Singapore, <sup>36</sup>Scientific Direction, IRCCS Ca'

Granda Ospedale Maggiore Policlinico di Milano, Milan, Italy, <sup>37</sup>Department of Medicine, Massachusetts General Hospital, Boston, USA, <sup>38</sup>BIOMERIS (BIOMedical Research Informatics Solutions), Pavia, Italy, <sup>39</sup>Department of Pediatrics-Section of Nephrology, Brenner Children's, Wake Forest School of Medicine, Winston Salem, United States, <sup>40</sup>Department of Biomedical Informatics, University of Kentucky, Lexington, United States, <sup>41</sup>Department of Legal, Economic and Social Sciences, University Magna Graecia of Catanzaro, Catanzaro, Italy, <sup>42</sup>Health Catalyst, INC., Cambridge, United States, <sup>43</sup>Department of Surgery, ASST Pavia, Lombardia Region Health System, Pavia, Italy, <sup>44</sup>Clinical Research Unit of Botucatu Medical School, São Paulo State University, Clinical Research Unit of Botucatu Medical School, São Paulo State University, Botucatu, Brazil, <sup>45</sup>Pediatric emergency Department, Hôpital Necker-Enfants Malades, Assistance Public-Hôpitaux de Paris, Paris, France, <sup>46</sup>National Center for Infectious Diseases, Tan Tock Seng Hospital, Singapore, Singapore, <sup>47</sup>BIG-ARC, The University of Texas Health Science Center at Houston, School of Biomedical Informatics, Houston, United States, <sup>48</sup>Department of Pediatrics, Medical University of South Carolina, Charleston, United States, <sup>49</sup>Internal Medicine Department, Botucatu Medical School, São Paulo State University, Botucatu, Brazil, <sup>50</sup>Department of Surgery, St. Luke's University Health Network, Bethlehem, United States, <sup>51</sup>Department of Medicine, Division of Nephrology, Ente Ospedaliero Cantonale, Lugano, Switzerland, <sup>52</sup>IT Department, ASST Pavia, Voghera, Italy, <sup>53</sup>Health Informatics, Hospital Universitario 12 de Octubre, Madrid, Spain, <sup>54</sup>Strategy and Transformation Department, APHP Greater Paris University Hospital, Paris, France, <sup>55</sup>Digital Research, Informatics and Virtual Environments (DRIVE), Great Ormond Street Hospital for Children, UK, London, United Kingdom, <sup>56</sup>North Carolina Translational and Clinical Sciences (NC TraCS) Institute, UNC Chapel Hill, Chapel Hill, United States, <sup>57</sup>IT department, Innovation & Data, APHP Greater Paris University Hospital, Paris, France, <sup>58</sup>Division of Infectious Diseases I, Fondazione I.R.C.C.S. Policlinico San Matteo, Pavia, Italy, <sup>59</sup>Department of Cardiology, Boston Children's Hospital, Harvard Medical School, Boston, United States, <sup>60</sup>Department of Biomedical Informatics, HEGP, APHP Greater Paris University Hospital, Paris, France, <sup>61</sup>Department of Medical and Surgical Sciences, Data Analytics Research Center, University Magna Graecia of Catanzaro, Catanzaro, Italy, <sup>62</sup>Department of Anesthesia, St. Luke's University Health Network, Bethlehem, United States, <sup>63</sup>Université Paris-Saclay, Inria, CEA, Palaiseau, France, <sup>64</sup>INRIA Sophia-Antipolis – ZENITH team, LIRMM, Montpellier, France, <sup>65</sup>Department of Internal Medicine, University of Kentucky, Lexington, United States, <sup>66</sup>Computational Health Informatics Program, Boston Children's Hospital, Boston, United States, <sup>67</sup>UOC Ricerca, Innovazione e Brand reputation, ASST Papa Giovanni XXIII, Bergamo, Bergamo, Italy, <sup>68</sup>Informatics Institute, University of Alabama at Birmingham, Birmingham, United States, <sup>69</sup>Biomedical Informatics Center, Medical University of South Carolina, Charleston, United States, <sup>70</sup>Clinical Research Informatics, Boston Children's Hospital, Boston, United States, <sup>71</sup>IT department, Innovation & Data (APHP), UMRS1142 (INSERM), APHP Greater Paris University Hospital, INSERM, Paris, France, <sup>72</sup>Department of Biomedical and Health Informatics, Children's Hospital of Philadelphia, Philadelphia, United States, <sup>73</sup>VA Informatics and Computing Infrastructure, VA Salt Lake City Health Care System, Salt Lake City, United States, <sup>74</sup>SED/SIERRA, Inria Centre de Paris, Paris, France, <sup>75</sup>Health Information Technology & Services, University of Michigan, Ann Arbor, United States, <sup>76</sup>Heinrich-Lanz-Center for Digital Health, University Medicine Mannheim, Heidelberg University, Mannheim, Germany, <sup>77</sup>Department of Computational Biology and Bioinformatics, University of Michigan, Ann Arbor, United States, <sup>78</sup>Biostatistics, Perelman School of Medicine at the University of Pennsylvania, Philadelphia, United States, <sup>79</sup>Department of Anesthesiology, Critical Care, and Pain Medicine and Computational Health Informatics Program, Boston Children's Hospital, Boston, United States, <sup>80</sup>Institute of

Digitalization in Medicine, Faculty of Medicine and Medical Center, University of Freiburg, Freiburg, Germany, <sup>81</sup>Institute of Medical Biometry and Statistics, Institute of Medical Biometry and Statistics, Medical Center, University of Freiburg, Freiburg, Germany, <sup>82</sup>Department of Preventive Medicine, Northwestern University, Chicago, United States, <sup>83</sup>Department of Biomedical Informatics, HEGP, APHP Greater Paris University Hospital, Paris, France, <sup>84</sup>Center for Precision Psychiatry, Massachusetts General Hospital, Boston, United States, <sup>85</sup>Medical University of South Carolina, Charleston, United States, <sup>86</sup>Department of Pediatrics, Division of Human Genetics, The Children's Hospital of Philadelphia and the Perelman School of Medicine at the University of Pennsylvania, Philadelphia, United States, <sup>87</sup>Center for Medical Information and Communication Technology, University Hospital Erlangen, Germany, <sup>88</sup>Renaissance Computing Institute/Department of Computer Science, University of North Carolina, Chapel Hill, Chapel Hill, United States, <sup>89</sup>Clinical Research Unit, Saint Antoine Hospital, APHP Greater Paris University Hospital, Paris, France, <sup>90</sup>Clevy.io, Paris, France, <sup>91</sup>Department of Biostatistics, Harvard T. H. Chan School of Public Health, Boston, United States, <sup>92</sup>Department of Anaesthesia, National University Health Systems, Singapore, Singapore, Singapore, <sup>93</sup>Department of Biostatistics, Epidemiology and Informatics, University of Pennsylvania Perelman School of Medicine, Philadelphia, United States, <sup>94</sup>Harvard Catalyst, Harvard Medical School, Boston, United States, <sup>95</sup>Clinical Research Unit, Paris Saclay, APHP Greater Paris University Hospital, Boulogne-Billancourt, France, <sup>96</sup>Medical Informatics Center, Hospital das Clínicas, Faculty of Medicine of Botucatu, Clinical Research Unit of Botucatu Medical School, São Paulo State University, Botucatu, Brazil, <sup>97</sup>Department of Surgery, Beth Israel Deaconess Medical Center, Boston, United States, <sup>98</sup>Department of Anesthesiology and Critical Care, Children's Hospital of Philadelphia, Philadelphia, United States, <sup>99</sup>Department of Medical and Surgical Sciences, Infectious and Tropical Disease Unit, University Magna Graecia of Catanzaro, Catanzaro, Italy, <sup>100</sup>ENS, PSL University, Paris, France, <sup>101</sup>Department of Medical and Surgical Sciences, University Magna Graecia of Catanzaro, Catanzaro, Italy, <sup>102</sup>Internal Medicine Department of Botucatu Medical School, São Paulo State University, Botucatu, Brazil, <sup>103</sup>Department of Biomedical Health Informatics, Children's Hospital of Philadelphia, Philadelphia, United States, <sup>104</sup>Department of Computational Biomedicine, Cedars-Sinai Medical Center, West Hollywood, United States, <sup>105</sup>Pediatric Infectious Disease Department, Hospital Universitario 12 de Octubre, Madrid, Spain, <sup>106</sup>Department of Biostatistics, Epidemiology, and Informatics, Institute for Biomedical Informatics, University of Pennsylvania Perelman School of Medicine, Berwyn, United States, <sup>107</sup>Department of Infectious Diseases, Great Ormond Street Hospital for Children, UK, London, United Kingdom, <sup>108</sup>Harvard Catalyst | The Harvard Clinical and Translational Science Center, Harvard Medical School, Boston, United States, <sup>109</sup>Department of Biomedical informatics, WiSDM, National University Health System Singapore, Singapore, Singapore, <sup>110</sup>Department of Psychiatry, University of Pennsylvania Perelman School of Medicine, Philadelphia, United States, <sup>111</sup>Computational Health Informatics Program and Department of Pediatrics, Boston Children's Hospital, Harvard Medical School, Boston, United States, <sup>112</sup>CTSI, WFBMI, Wake Forest School of Medicine, Winston Salem, United States, <sup>113</sup>NC TraCS Institute, UNC Chapel Hill, Chapel Hill, United States, <sup>114</sup>Department of Surgery, Beth Israel Deaconess Medical Center, Harvard Medical School, Boston, United States, <sup>115</sup>Department of Medical Informatics, University of Erlangen-Nürnberg, Erlangen, Germany, <sup>116</sup>Clinical Research Unit São Paulo State University, Brazil, Clinical Research Unit of Botucatu Medical School, São Paulo State University, Botucatu, Brazil, <sup>117</sup>Office of Research and Development, Department of Veterans Affairs, Washington, DC, United States, <sup>118</sup>Division of Infectious Diseases, Department of Medicine II, Medical Center – University of Freiburg, Faculty of Medicine, Freiburg, Germany, <sup>119</sup>Pediatric Infectious Disease Department, Hospital

Universitario 12 de Octubre, Madrid, Spain, <sup>120</sup>Biomedical Data Science Lab, ITACA Institute, Universitat Politècnica de València, Spain, Valencia, Spain, <sup>121</sup>Department of Pediatrics (Critical Care), Northwestern University Feinberg School of Medicine, Chicago, United States, <sup>122</sup>Nurse department of FMB - medicine school of Botucatu, Clinical Research Unit of Botucatu Medical School, São Paulo State University, Botucatu, Brazil, <sup>123</sup>ASST Pavia, Lombardia Region Health System, Management Engineer, Direction, Pavia, Italy, <sup>124</sup>Data Analytics Center, University of Pennsylvania Health System, Philadelphia, United States, <sup>125</sup>Department of Anesthesiology, University Hospital Erlangen, FAU Erlangen-Nürnberg, Erlangen, Germany, <sup>126</sup>Hôpital Saint Louis, Department of Biostatistics and Bioinformatics, APHP Greater Paris University Hospital, Paris, France, <sup>127</sup>MICHR Informatics, University of Michigan, Ann Arbor, United States, <sup>128</sup>Department of Neurology, University of Pittsburgh Medical Center, Pittsburgh, United States, <sup>129</sup>Critical Care Medicine, Department of Medicine, St. Luke's University Health Network, Bethlehem, United States, <sup>130</sup>Department of Biomedical Health Informatics and the Department of Pediatrics, The Children's Hospital of Philadelphia and the University of Pennsylvania Perelman Medical School, Philadelphia, United States, <sup>131</sup>Department of Information Management, National Central University, Taoyuan, Taiwan, <sup>132</sup>Clinical & Translational Science Institute, Medical College of Wisconsin, Milwaukee, United States, <sup>133</sup>Université Paris-Saclay, Inria, CEA, Montréal Neurological Institute, McGill University, Palaiseau, France, <sup>134</sup>SequeL, Inria Lille, Villeneuve-d'Ascq, France, <sup>135</sup>Respiratory Department, ICS S. Maugeri IRCCS Pavia Italy, Lumezzane (BS), ITALY, <sup>136</sup>Department of Health Management and Informatics, University of Missouri, Columbia, Columbia, United States, <sup>137</sup>Department of Anesthesiology and Critical Care Medicine, Children's Hospital of Philadelphia and University of Pennsylvania, Philadelphia, United States, <sup>138</sup>Department of Oncology, ASST Papa Giovanni XXIII, Bergamo, Bergamo, Italy.
